# Supplementary material for: A DNA methylation age predictor for zebrafish
Source: Aging (Albany NY). 2020 Dec 23;12(24):24817–35. doi: 10.18632/aging.202400 (PMC7803548; doi:10.18632/aging.202400)
Supplement: Supplementary Table 1 [file aging-12-202400-s002.xlsx]

## Sheet: pd_ZebrafishRRBS
Supplementary Table 1. Phenotype and sequencing data of the 96 caudal fin tissue from zebrafish used for RRBS.
Sample ID	Tissue	Age_Weeks	Sex	Total Sequences	%GC	Average 5mC Level (%)	Average CG Level (%)	Sites before filtering	Average Reads per site
Z528	Caudal Fin Clip	11.9	Female	44671805	35	0.727275	82.3831	422498	19.0057
Z532	Caudal Fin Clip	11.9	Female	44321572	34	0.740415	82.2604	534988	15.7831
Z536	Caudal Fin Clip	11.9	Female	43028351	34	0.632691	82.38	454594	17.7488
Z548	Caudal Fin Clip	12.9	Female	45506581	34	0.745127	81.1883	530019	15.9473
Z552	Caudal Fin Clip	12.9	Female	47302239	32	0.628721	79.8375	470004	11.445
Z556	Caudal Fin Clip	12.9	Female	48216283	33	0.711274	81.5027	559452	16.9877
Z27	Caudal Fin Clip	13.9	Female	38945262	34	0.748509	81.2704	517366	13.7217
Z34	Caudal Fin Clip	13.9	Male	49191331	33	0.760515	81.4457	555302	16.1137
Z55	Caudal Fin Clip	14.9	Female	48676647	33	0.75253	81.62	559020	16.0703
Z62	Caudal Fin Clip	14.9	Male	51480163	33	0.669242	81.3952	526431	16.1296
Z83	Caudal Fin Clip	15.9	Female	49459298	34	0.722831	81.5174	462510	11.4727
Z90	Caudal Fin Clip	15.9	Male	50679424	33	0.885728	81.8823	579950	15.5485
Z201	Caudal Fin Clip	16.9	Female	41493257	33	0.608755	80.9367	441643	11.6996
Z205	Caudal Fin Clip	16.9	Male	41564865	33	0.559017	80.7818	455500	12.0096
Z209	Caudal Fin Clip	17.9	Female	43761523	32	0.676393	79.7483	481004	11.1183
Z213	Caudal Fin Clip	17.9	Male	41837168	33	0.595173	80.2755	466784	11.097
Z249	Caudal Fin Clip	18.3	Male	53697879	42	0.665391	82.9891	347725	21.112
Z253	Caudal Fin Clip	18.3	Female	43760886	33	0.670703	82.2013	522541	15.6358
Z265	Caudal Fin Clip	19.9	Male	40200921	33	0.538598	80.8712	443432	12.1392
Z269	Caudal Fin Clip	19.9	Female	44929399	33	0.668271	82.5998	525636	16.439
Z281	Caudal Fin Clip	20.7	Male	39536319	33	0.692841	82.8729	514574	15.3803
Z285	Caudal Fin Clip	20.7	Female	43278276	34	0.646802	82.1845	504286	15.7112
Z321	Caudal Fin Clip	21.9	Female	41705700	32	0.581	81.2363	420089	10.7564
Z329	Caudal Fin Clip	21.9	Male	38872923	35	0.631818	83.9494	341914	20.9472
Z333	Caudal Fin Clip	21.9	Male	43209372	34	0.768717	82.8954	506840	14.8127
Z353	Caudal Fin Clip	22.9	Male	38827905	34	0.673503	82.0431	470524	15.2089
Z357	Caudal Fin Clip	22.9	Male	43950688	33	0.725325	82.0907	538748	15.9663
Z361	Caudal Fin Clip	22.9	Female	39899308	34	0.66079	82.5449	494454	15.8587
Z433	Caudal Fin Clip	23.9	Female	44347283	33	0.694449	82.5425	519403	16.5443
Z441	Caudal Fin Clip	23.9	Male	40214531	33	0.582507	79.988	437635	11.6737
Z445	Caudal Fin Clip	23.9	Male	43440085	34	0.651696	83.022	494870	16.1408
Z477	Caudal Fin Clip	24.9	Female	44773982	32	0.656204	82.4023	539822	15.5929
Z485	Caudal Fin Clip	24.9	Male	46571520	33	0.812587	81.9011	567927	15.9189
Z489	Caudal Fin Clip	24.9	Male	43373971	33	0.705549	82.063	514838	15.3546
Z560	Caudal Fin Clip	25.9	Male	46015204	33	0.742473	82.0175	539630	15.8894
Z564	Caudal Fin Clip	25.9	Male	43792518	33	0.604725	80.7843	439080	10.9414
Z568	Caudal Fin Clip	25.9	Female	45532675	33	0.809638	81.9074	557376	14.7758
Z157	Caudal Fin Clip	37.1	Female	49120346	33	0.747657	81.9139	567224	16.2858
Z165	Caudal Fin Clip	37.1	Male	44536972	33	0.667953	82.3643	502668	16.0421
Z173	Caudal Fin Clip	38.1	Female	44879567	33	0.732708	81.5122	530557	15.1835
Z180	Caudal Fin Clip	38.1	Male	39868604	33	0.668408	81.312	481716	15.2305
Z225	Caudal Fin Clip	39.1	Female	53647288	33	0.913772	82.0725	621698	16.5203
Z229	Caudal Fin Clip	39.1	Male	41287109	33	0.681631	81.3844	540626	15.1338
Z233	Caudal Fin Clip	39.6	Male	42426812	33	0.680924	81.7669	504055	15.3593
Z237	Caudal Fin Clip	39.6	Female	47305846	33	0.707282	82.0827	556647	16.5803
Z257	Caudal Fin Clip	41.1	Male	44918117	33	0.614937	82.0758	552273	17.8582
Z261	Caudal Fin Clip	41.1	Female	43392928	33	0.812347	81.5988	518100	14.9289
Z289	Caudal Fin Clip	42	Male	53405822	34	0.745188	82.2132	568925	18.108
Z293	Caudal Fin Clip	42	Female	44658280	32	0.466225	81.0763	501498	18.1248
Z305	Caudal Fin Clip	43.1	Female	43689072	33	0.773406	80.6045	453214	11.5824
Z313	Caudal Fin Clip	43.1	Male	19023534	33	0.441397	80.6363	328100	7.72167
Z317	Caudal Fin Clip	43.1	Male	43326963	33	0.474581	80.6355	473383	17.2541
Z385	Caudal Fin Clip	44.1	Male	40829013	33	0.52098	80.8774	401516	12.1467
Z389	Caudal Fin Clip	44.1	Female	34017703	33	0.466766	81.3	438825	14.9283
Z393	Caudal Fin Clip	44.1	Female	46437022	33	0.484753	81.1855	495267	18.3618
Z401	Caudal Fin Clip	45.1	Female	39942645	33	0.452458	81.0504	430419	11.3868
Z405	Caudal Fin Clip	45.1	Female	44986974	33	0.52956	80.6953	543824	16.9547
Z409	Caudal Fin Clip	45.1	Female	46994626	33	0.566186	80.5353	550342	16.2413
Z449	Caudal Fin Clip	46.1	Female	50745094	35	0.505585	81.8767	466484	21.0883
Z453	Caudal Fin Clip	46.1	Female	36587891	35	0.512777	80.5438	453872	14.8918
Z12	Caudal Fin Clip	48.1	Female	46269853	32	0.53855	80.6467	546074	16.2156
Z20	Caudal Fin Clip	48.1	Male	46820635	32	0.566221	80.5183	587198	15.4171
Z41	Caudal Fin Clip	49.1	Female	39953128	34	0.537136	81.7896	430128	18.7551
Z48	Caudal Fin Clip	49.1	Female	46574608	32	0.470831	81.875	596715	19.3805
Z69	Caudal Fin Clip	50.1	Male	51222742	32	0.559682	80.793	560505	17.4264
Z76	Caudal Fin Clip	50.1	Male	49605972	33	0.546223	80.6241	551943	16.9718
Z1	Caudal Fin Clip	51.1	Female	45867806	34	0.672555	81.7107	546365	16.3081
Z141	Caudal Fin Clip	51.1	Male	43099459	33	0.553055	81.7685	550458	15.5034
Z145	Caudal Fin Clip	51.1	Female	100357338	32	0.54	80.54	550879	16.2
Z149	Caudal Fin Clip	51.1	Female	48135772	33	0.485769	82.1178	552559	18.417
Z3	Caudal Fin Clip	51.1	Male	20997546	34	0.532705	81.6437	399188	11.0478
Z101	Caudal Fin Clip	52.1	Female	48493024	32	0.557001	81.1304	601469	16.2501
Z109	Caudal Fin Clip	52.1	Male	43670591	33	0.547	79.87	604587	15.8
Z133	Caudal Fin Clip	52.1	Male	48144239	33	0.527987	81.2126	560075	17.6303
Z97	Caudal Fin Clip	52.1	Male	45867765	32	0.625662	81.4497	597975	15.0551
Z241	Caudal Fin Clip	52.6	Female	48434221	33	0.416574	82.1738	587378	18.8261
Z273	Caudal Fin Clip	54.1	Male	44166052	33	0.526069	81.8495	540997	17.2366
Z277	Caudal Fin Clip	54.1	Female	46144216	33	0.547661	82.0559	567361	17.4658
Z297	Caudal Fin Clip	55	Male	44538918	34	0.551864	81.4483	502932	16.7487
Z301	Caudal Fin Clip	55	Female	44633754	33	0.479669	82.0257	531478	17.2625
Z341	Caudal Fin Clip	56.1	Female	39296071	34	0.578525	81.8561	457826	14.1519
Z345	Caudal Fin Clip	56.1	Male	44976423	33	0.517597	81.3028	537743	16.8136
Z349	Caudal Fin Clip	56.1	Male	49137195	33	0.54873	81.9737	563930	17.8658
Z369	Caudal Fin Clip	57.1	Male	51135267	33	0.611364	80.9553	576975	17.3177
Z373	Caudal Fin Clip	57.1	Male	48916029	33	0.537922	81.6372	550263	18.3274
Z377	Caudal Fin Clip	57.1	Male	41604898	33	0.499701	81.8378	505476	15.9407
Z381	Caudal Fin Clip	57.1	Female	43843714	34	0.62924	80.798	512022	16.3232
Z421	Caudal Fin Clip	58.1	Female	44584499	34	0.542353	81.8519	550033	17.5355
Z425	Caudal Fin Clip	58.1	Male	45180988	33	0.560801	80.8561	553088	17.2614
Z429	Caudal Fin Clip	58.1	Male	45550466	33	0.621175	81.5654	502107	16.6542
Z461	Caudal Fin Clip	59.1	Female	46568915	34	0.669329	80.7694	526785	17.0322
Z465	Caudal Fin Clip	59.1	Female	46877604	34	0.664312	81.1116	540806	18.3246
Z469	Caudal Fin Clip	59.1	Female	47716215	34	0.650373	81.2752	540426	17.6251
Z576	Caudal Fin Clip	60.1	Male	49901965	34	0.756116	81.0767	565210	17.1645
Z580	Caudal Fin Clip	60.1	Male	41779154	33	0.604041	81.33	512558	16.6053
Z584	Caudal Fin Clip	60.1	Female	43951664	33	0.536708	82.2177	591707	17.4783
