# Supplementary material for: A DNA methylation age predictor for zebrafish
Source: Aging (Albany NY). 2020 Dec 23;12(24):24817–35. doi: 10.18632/aging.202400 (PMC7803548; doi:10.18632/aging.202400)
Supplement: Supplementary Table 3 [file aging-12-202400-s004.xlsx]

## Sheet: Sheet1
Supplementary Table 3. Primer sequences targeting the 29 CpG sites for multiplex PCR and weights for age-estimation (Primers in red were unable to be optimised for multiplex PCR).
CpG site				Primer Sequence
chr	position	strand	Weight	Forward	Reverse	Pool	Amplicon Size (bp)	Amplicon Sequence
Intercept	NA	NA	1.35656
chr12	21540399	+	NA	gacatggttctacaaATaaCCTcNaaAaACTCCTC	cagagacttggtctTTGTtAGTGTGTGTGTGTTTTAT	2	125	GATGGCCTCGGGAGACTCCTCCGGGACGCAGTCCATCAAACCACCTTACAGACTCCAGAAGGTACATGCTTCAAATAAATAAGTAAACGGCCCGGATACATCATAAAACACACACACACTGACAA
chr12	35432443	+	0.172804	gacatggttctacaTGAGTGTTTGTTTGGTtAAGtAT	cagagacttggtctCAaaACAaTTCCTCCACCC	2	146	TGAGTGTTTGTTTGGTCAAGCATCGGCTCTCTCTCTCCCTCGTGCACGCGCAGATATCTGCACAGCTGTGACCCACATAGCGGACAAGACAGGTGCTGCTGCTCGGCCGGGCAGGTGGTCATCCTGTGGGTGGAGGAACTGTCCTG
chr13	31180246	+	0.0374817	gacatggttctacaAaCCCcNaAaAACCACTAC	cagagacttggtctAAtAAGAtAGtTGAAATttTtAAGGTGTtTA	1	143	AGCCCCGGAGAACCACTACAGGTTACTTTCCAGGCCTTCTTCAACAAATGAGCTGTTGCCGGCGGCTGGTTTCCCTGTGAGCCCTCTGAATAATTATGTGTACCGCCGGCTCTAGACACCTTGAGGATTTCAGCTGTCTTGTT
chr13	38582448	+	0.12808	cagagacttggtctTTACATCTaAATAaaTaTTTCCCTTTaTaAT	gacatggttctacattttTGtATTGTGAGGAGTTtATAA	1	135	TTACATCTGAATAGGTGTTTCCCTTTGTGATGTCGCCGCTTTTGTTAAGTGGGGAAGGCGCGAAGCCGGAGACAATGGCGTTCGTGTTTGGTGCGGAAAAGCGGCTCTGTTTATGAACTCCTCACAATGCAGGGG
chr14	38455793	-	NA	gacatggttctacaGANgGtAttAGtttTGtTttAttAG	cagagacttggtctTaaTTAaCTCATTTCCCTaTTCTTT	2	152	GACGGCACCAGCCCTGCTCCACCAGCACCGGCAGAAGCGACACTTCAGCATACTGACGCAAACGCTCCTGGTGAGAGGAATCTGGGATAATGTCCAGTCCCACCTGCGAAATCAGCTCCTGCAACACAAAGAACAGGGAAATGAGCTAACCA
chr14	45387151	+	-0.0225109	gacatggttctacaGATTGAGGtAGTTtTGAAGAtAA	cagagacttggtctTCCTTAAAaCATAACCATTaTTTCT	1	127	gattgaggcagttctgaagacaaaagggggtccaacacggtactcataaggtgtacctaataaagtggccggtgagtgTAAATGGGGAAAAAACGAAGCGCTAGAAACAATGGTTATGCTTTAAGGA
chr17	52836692	+	-0.296035	gacatggttctacaTcNaATCACAAATCTCCAATC	cagagacttggtcttAGtAGATGtNgtTTTAGATtAG	2	133	TCGGATCACAAATCTCCAATCATTTCTGAAAGTCGAGACCGCATTAATTTATTCACACGAAACACACACTTGTTTTCCACACACATACAGCATTTAATGCCGGGAACACGCTGATCTAAAGCGGCATCTGCtg
chr18	38107080	+	-0.0613422	gacatggttctacaNgGTtTGTGTATGTGAAAGTG	cagagacttggtctCCACCTCAAATCATTCTCC	2	149	CGGTCTGTGTATGTGAAAGTGCGAGGCACTCCGGCTTCAAATAGCAGGGACAGGGAGACGGACGGATTTATTAATGGCCAGGAACCAGGGTGCAGGGGCGGGGGGGATCCGAGATCCGGAGAGGAAGACTGGAGAATGATTTGAGGTGG
chr18	50792250	+	-0.820283	cagagacttggtctTaAACATCTCCTaaATCTCTaCA	gacatggttctacaGtAtTGAATATtAAAGtTGAATGTG	2	136	TGAACATCTCCTGGATCTCTGCATCTCTGCTTGCTGTCTGCTTTGAGAGTAAATATATGATATAAAGGTGCTGTAGAGGAGCCGTGCCGGCCTGTAGAGCGAGCGCCGGTGCACATTCAGCTTTGATATTCAGTGC
chr19	20077224	+	2.50964	gacatggttctacaAacNTACTTTACTaTCTCACC	cagagacttggtctGtTGtNgGtTtAAAtTTTAAtAGG	1	130	AGCGTACTTTACTGTCTCACCACCGCTGCCGCTCCGGCGTGAGGGCACACTCCCACACACATGCGCGTGTATGTTAAGTCGCTCTTGATGTGGTCATATTTATGTTCCTGTTAAAGTTTGAGCCGGCAGC
chr1	23386154	+	0.199901	gacatggttctacatATGTtttTGTGGGTGGAGTT	cagagacttggtctCcNCCACCATCTTAACCA	1	134	CATGTCCCTGTGGGTGGAGTTCATCACCGCCTCCGGTTATCTATCGGCACGAAAGATTCGCTCCCGCTTTCAGACGCTGGTTGCCCAGGCCGTGGATAAATGCAGCTACCGGGACGTGGTTAAGATGGTGGCGG
chr1	43259461	+	-0.614295	gacatggttctacaATAGtTGTAttAGTGTTTGTGTG	cagagacttggtctCCCTTCCTaCCCCCTC	2	141	ATAGCTGTACCAGTGTTTGTGTGTGTGTACCGGAGGAAGGTTTTGTGCTGGTATGCCGTTGTTGGGACCAAGACCCGGCACAGATGGGTCCTGCTGCAGTGGAGGGATCTGAGCGGGGTTAATCTGAGGGGGCAGGAAGGG
chr20	16578711	-	0.108758	gacatggttctacacNaCCAaaTaaAaCAaAaACCC	cagagacttggtctAAGGAGAtANgtTGttttTGAAG	1	123	CGGCCAGGTGGAGCAGAGACcctgccgcctccttcatctcctcgtcctcctcctcttcctcctcctcttcTTTGACCAGGATGTTTTCGGCGCGCCTCTTCTTCAGGGGCAGCGTGTCTCCTT
chr20	21624045	+	0.157608	cagagacttggtctCTCTaACCCCTaCCTCCC	gacatggttctacagtNgGttTAtAAttTGAtATGTTAA	2	147	CTCTGACCCCTGCCTCCCCAGGAGCCTTGGCTCTGTCGGAGACGATTCAAATCACAGGGACTGTGGCTATCAATCAAACACGGGGACCGGAGCTCAACCGAAGAATATGTCAAGAAGCCATTTTAACATGTCAGGTTGTAGGCCGGC
chr20	26523373	+	0.936519	gacatggttctacaAATTCCAaCTCAAATCTTCTTCT	cagagacttggtctAAAANgTGTAAATGAGAGAGAAA	2	149	AATTCCAGCTCAAATCTTCTTCTAAACGAGTGATAACAACCCTAATCCAGTTTGGTCCGGAACCTGCAGACAACACGGAAACTCATCTGGTTAAGCCTGGTATTTTATCTCTGCTAAACTGGATGCTTTCTCTCTCATTTACACGTTTT
chr20	28928268	+	1.37121	cagagacttggtctTATTGtTTtAAGTGTGtAAtTTGTG	gacatggttctacaTATcNTCAaCAATAATACTaCAATT	1	129	TATTGCTTCAAGTGTGCAACTTGTGCGCGGTTCCAAACAGGAAGTGGCGCGCTGGCAACCGGGAAGATATACATCACTGCACAGCGCTGATAAGTAAAAACTATAATTGCAGTATTATTGCTGACGATA
chr21	23231786	+	-0.00360434	gacatggttctacaTTTACCcNaTTTTATAAATaCCC	cagagacttggtctGAtTAGATTGTtAGAtATTTAGTATG	2	149	TTTACCCGGTTTTATAAATGCCCAACAATGCAAAGTTTGCGAAGCAAGAACACTCTGTCGTGCTGCTGATAGGCCAAACTCTGTTCCAACGCCCGGGGAGAACTTTAAATAAACAATTGTCTTCATACTAAATGTCTGACAATCTAGTC
chr21	25150743	+	-0.709239	gacatggttctacatNgTtAGATTTGGAGttAttTATG	cagagacttggtctTAAACCCAAACCTCCTCCC	2	122	CCGTCAGATTTGGAGCCACCTATGGAGGCAACCGTCTGTTCTCTGGAGCCCGGAGTGGTGGAGGCGCCAGCTCGGCTCTGTCCCGTTCACTCGGCCTGGCAAGGGGAGGAGGTTTGGGTTTA
chr24	19868851	+	0.187006	cagagacttggtctGtTtTTttTAtATGtTATGAAATTTtAGAtATG	gacatggttctacaCCCCTAACATCTATaTCTACA	2	148	GCTCTTCCTACATGCTATGAAATTTCAGACATGTGCGGGCATTGAAAGGAGTCAAAGGCAATACCCAGAACAAATGTGTTGATAGAGATCCCGGATATTGTGGTGCCAACAACAAAACGGAGGGCAATGTAGACATAGATGTTAGGGG
chr24	4215673	+	NA	gacatggttctacaTTTaaaTTCCAacNTTaACTTTTAAATTCCT	cagagacttggtctgGtTTTtTGtttTTGATtTGttATG	2	152	TTTGGGTTCCAGCGTTGACTTTTAAATTCCTAGAAACAAAGGCAGACTCCACTAATCAGGCAGATTCCAGGACACAGGATGATCAGAGGACCGGTTCTACCAGCTTCCGCCGTGTTTGTAGATGACACATGGCAGATCAAGGGCAGAAAGCC
chr25	14631230	+	-0.183467	gacatggttctacaTTATtAGAtAGTGGTAAATAAAGGT	cagagacttggtctCAaATTaATCAAaCTaTCAaCACC	2	129	TTATCAGACAGTGGTAAATAAAGGTCTGGCCCGGGTTACCGCAGGCTGTCAGCAGGCCCGTCCCGGAGGGGAAATAAAACTCTTATTAACATGCTTCTGCTCATTGGTGCTGACAGCTTGATCAATCTG
chr25	16313450	+	0.5212	cagagacttggtctGTGTTTGGAAGAATAGAGAGG	gacatggttctacaCTaTaTAAATTCCCTTCATaTCAAT	1	152	GTGTTTGGAAGAATAGAGAGGCCTAGGTCTGGGTTAGAGGAGATTACACTGCAGGCACGTCGGGTGAAGACTGGCTGGAGAAACTGCACACCGGCTCACTGTCACCATATTGTCCTTAAAGCAATAGATTGACATGAAGGGAATTTACACAG
chr25	36872756	+	-0.185145	gacatggttctacagAGtAGAGtTGAGGATTAAtAG	cagagacttggtctCTCCTaCACTCATCAaATCAA	1	153	GAGCAGAGCTGAGGATTAACAGCAGTCTCTGACCTACAGCTGCGTTTCTGAGCAGCACCGCGGAGTCCAGAGCCATGAGATGATGGAGATCCTGACCTGAAGTGAGTCTGAGTGTGAATGAGCGGATCCGGATTGATCTGATGAGTGCAGGAG
chr25	6461988	+	-0.746038	cagagacttggtctAAAAGTtAAAGtAGAtAGGGAGT	gacatggttctacaCCTTTaCTCTTTaaCTTCCCA	1	146	AAAAGTCAAAGCAGACAGGGAGTGGGTTTTTATGAACATGCATTTCTGAGCGCCGATGAAATTTTGGTCCTGGACAGATGGATGAATATCTGCCGGGAGATGGCGAACATGAAGAGAGTCAGAAATGGGAAGCCAAAGAGCAAAGG
chr2	8207957	+	2.46712	cagagacttggtctCAaaaCcNaTaACATTCTaCATC	gacatggttctacaANgtAGAtTTGtAAAGTGAATAAAA	1	137	CAGGGCCGGTGACATTCTGCATCCCAGGCGCTCGCTGTTCTTTAAACACACTCCGATCAGTGGAGCAAAACTGTGTGAGCCGGCTTCCGCGAATTAACCGCACATGCCAATGTTTTATTCACTTTGCAAGTCTGCGT
chr3	23616782	+	0.206688	cagagacttggtctTTATaTTTTATTTCATTCCCACCC	gacatggttctacaAtAGGTATNgGTTGAAGTGAA	2	150	TTATGTTTTATTTCATTCCCACCCCAGCGGAGAGCAGCGGTGGTGAGAAAAGCCCTCCGGGTTCTGCAGCTTCCAAGAGAGCACGCACCGCTTACACCAGCGCACAGCTGGTGGAGCTCGAGAAGGAGTTTCACTTCAACCGATACCTGT
chr4	17690807	+	-0.960895	cagagacttggtctGGtTAAAtATGTGTTTTTGTGTG	gacatggttctacaaTTTaACCcNaAaCTaCTCAaTT	2	130	GGCTAAACATGTGTTTTTGTGTGGCAGACGACTGATAAAGAGGCTCCGGGATTGGTCCGCATGCACACTCTGGCCTACTTGAGCGGCTTTCCAGCATCGCTGAAGGAAACTGAGCAGCTCCGGGTCAAAC
chr4	18675145	+	0.00824058	cagagacttggtctATTTCATCTaCAaTaACCACATAC	gacatggttctacaTTtAAAAtAGAGGTGTGTtTGAAAA	1	139	ATTTCATCTGCAGTGACCACATACACACACACACTTTGCATCCACGGCCTACCTGGGAATCCGCCTGGTAGAGAGATAATTACCGGATCACAATCCCCATCTCCTTTTTTTCGATTTTCAGACACACCTCTGTTTTGAA
chr5	51679905	+	-0.101482	cagagacttggtctttAAATGAAGttATGGtTGTGTG	gacatggttctacaaAaCAaTTCTaACACCTaTCTATAT	2	149	CCAAATGAAGCCATGGCTGTGTGATTGAGGTTTATAGTGGGAGGTCAGCAGTCTGGGCTCAGGAGTCCTCCGGGCACCATAAATCACCACAGGCCAATAAACACAGACAGCAGAATTTCTCAGTATATAGACAGGTGTCAGAACTGCTC
