# Supplementary material for: A DNA methylation age predictor for zebrafish
Source: Aging (Albany NY). 2020 Dec 23;12(24):24817–35. doi: 10.18632/aging.202400 (PMC7803548; doi:10.18632/aging.202400)
Supplement: Supplementary Table 4 [file aging-12-202400-s005.xlsx]

## Sheet: Sheet1
Supplementary Table 4. Primer sequences targeting the 29 CpG sites by methylation sensitive PCR.
CpG site			Methylated		Unmethylated
chr	position	strand	Forward	Reverse	Forward	Reverse
chr12	21540399	+	ATATATATAAACGGATGGTTTCGG	TTATATAAAACTAAACGAACCTAACG	ATATAAATGGATGGTTTTGGGA	TTATATAAAACTAAACAAACCTAACATTC
chr12	35432443	+	GGATAAGATAGGTGTTGTTGTTCG	GTATAACCTCTTTCTATCATCCCG	ATAAGATAGGTGTTGTTGTTTGG	TCATATAACCTCTTTCTATCATCCCA
chr13	31180246	+	TTGTGAGTTAATAAAGAAAAGAATAGAC	AAATCCTCAAAATATCTAAAACCGAC	TGTGAGTTAATAAAGAAAAGAATAGAT	AAAATCCTCAAAATATCTAAAACCAAC
chr13	38582448	+	GAGAAGAAATGAAGATGATTACG	ACCTATAACTACGTAAAAACAACGCA	GAGAAGAAATGAAGATGATTATG	CTACCTATAACTACATAAAAACAACACAAC
chr14	38455793	-	TGAGTTATTATGGTAAGAAGAGTGC	TATATTACAAAAACTAATTTCGCA	GAGTTATTATGGTAAGAAGAGTGTG	TATATTACAAAAACTAATTTCACAA
chr14	45387151	+	GATAAAAGGGGGTTTAATACGGT	ATAAAATACCTAAAACAAATTAATCG	AAGATAAAAGGGGGTTTAATATGGTA	AAATACCTAAAACAAATTAATCATTC
chr17	52836692	+	GCGAATATATAAAAGTAGAAGAAACGC	TACCGCTTTAAATCAACGTAT	GTGAATATATAAAAGTAGAAGAAATGTGTA	AATACCACTTTAAATCAACATATTCCC
chr18	38107080	+	TAGATAGATGTAACGTTGCGAG	CTTAATCTCACAATATAAAACGATAAACG	GGTAGATAGATGTAATGTTGTGAG	TCACAATATAAAACAATAAACAAAA
chr18	50792250	+	AGGTGTTGTAGAGGAGTCGTGTC	TAATTCTCTATACTCTAAAACCCGA	GTAGAGGAGTTGTGTTGGTT	AATTCTCTATACTCTAAAACCCAAT
chr19	20077224	+	AGATTTGTAAAAGTGTTGGTGC	GCGCATATATATAAAAATATACCCTCAC	TGTAAAAGTGTTGGTGTGTG	ACACACATATATATAAAAATATACCCTCAC
chr1	23386154	+	GCGGTGTTTAAGTTTAGCGAC	GAATACGCAATTTCACTTCGC	GTGGTGTTTAAGTTTAGTGATGG	CCAAATACACAATTTCACTTCACTC
chr1	43259461	+	GGGTTTTAATGAGGAAGACGATT	CAAAACCCATCTATACCGAAT	GGGGTTTTAATGAGGAAGATGAT	AACAAAACCCATCTATACCAAAT
chr20	16578711	-	TTGAATAGAAGTATTTAGATTTGCG	CTCTACTCCACCTAACCGACG	TGAATAGAAGTATTTAGATTTGTG	CTCTACTCCACCTAACCAACAT
chr20	21624045	+	TGGTTATTAATTAAATACGGGG	AAATCTTACGAAACGTATCTCGCT	TGTGGTTATTAATTAAATATGGGG	CTTTCAAATCTTACAAAACATATCTCACTA
chr20	26523373	+	AGTAGGATGATTAAAGAATGTTAGCGA	AACTTAACCAAATAAATTTCCGTAT	GAAGTAGGATGATTAAAGAATGTTAGTGAG	AAACTTAACCAAATAAATTTCCAT
chr20	28928268	+	AGTTGTATATATAATAAAATAAAGACGTT	CACAATAATATAAAAACAATAATTATACCG	TTAAATAGGAAGTGGTGTGTTG	AAACTATTAATATACAAATCCACAA
chr21	23231786	+	ATAGAAGCGGAGTTATTAAGCGAA	AAACTTATAAAACCAATACTCGAAA	TGGATAGAAGTGGAGTTATTAAGTGAA	AAAACTTATAAAACCAATACTCAAAA
chr21	25150743	+	ATGATAGAGTTAAGTTTGCGGAT	CGAATAAACGAAACAAAACCG	AAAATGATAGAGTTAAGTTTGTGGAT	ACCAAATAAACAAAACAAAACCAAA
chr24	19868851	+	TATGAAATTTTAGATATGTGCGGG	ATCTATATCTACATTACCCTCCGTT	TATGAAATTTTAGATATGTGTGGG	AACATCTATATCTACATTACCCTCCATT
chr24	4215673	+	GATTGATCGGTAAATCGAGA	TCCAAACAAACACTCCTAACGAT	GAAATGTAGATTGATTGGTAAATTGAG	CAAACAAACACTCCTAACAATC
chr25	14631230	+	TAGTGGTAAATAAAGGTTTGGTTCG	TTTCAACCTCCATCAAAACG	AATAAAGGTTTGGTTTGGGT	TCAACCTCCATCAAAACATCC
chr25	16313450	+	AGAGGAGATTATATTGTAGGTACGTCG	TATATAAACAATCTAAACTACACGACC	GGAGATTATATTGTAGGTATGTTGGG	CTATATAAACAATCTAAACTACACAACC
chr25	36872756	+	AGTTTGAGTGTGAATGAGCG	AACTCTCGAACGAAACCGTC	GTTTGAGTGTGAATGAGTGGAT	AAACTAAAACTCTCAAACAAAACCATC
chr25	6461988	+	GGTAATGGTTTAAATATGTGGTTCG	ACGTTAAATTAAATCAACACGTTA	AATGGTTTAAATATGTGGTTTGG	CACATTAAATTAAATCAACACATTA
chr2	8207957	+	TGCGTATCGTAGGGATGTTC	ATATACGATTAATTCGCGAAAACC	GTGTATTGTAGGGATGTTTGTAG	AAAACATTAACATATACAATTAATTCACAA
chr3	23616782	+	GTTTTATTAGTGGGAACGATG	CGATTAAAATAAAACTCCTTCTCG	ATTTTAGTGGAGAGTAGTGGTG	CAATTAAAATAAAACTCCTTCTCAAAC
chr4	17690807	+	GTTTTATTAGTGGGAACGATG	CGATTAAAATAAAACTCCTTCTCG	GTGTTTTTGTGTGGTAGATGA	AAAACTACTCAATTTCCTTCAACAATA
chr4	18675145	+	AATCGACGAGTGAGACGGTT	AAACAAAAATATATCTAAAAATCGAAA	GTTATGAATTGATGAGTGAGATGGTT	AAAACAAAAATATATCTAAAAATCAAAA
chr5	51679905	+	AAAAGGTTGTTGAGGTTGATACG	TTAACCTTAAACCTTATACCGAAA	TAAAAGGTTGTTGAGGTTGATATGTA	CTTAACCTTAAACCTTATACCAAAA
